# Supplementary material for: In situ dispersion of oil-based Ag nanocolloids by microdroplet coalescence and their applications in SERS detection
Source: Royal Society of Chemistry journal article supplement (doi:10.1039/c6ra05269j), 2016-01-01
Supplement: c6ra05269j1.pdf [file c6ra05269j1.pdf]

## Electronic Supplementary Information

# In situ dispersion of oil-based Ag nanocolloids by microdroplet coalescence and their applications in SERS detection

L. Du,<sup>a</sup> Y. J. Wang,<sup>b</sup> K. Wang,<sup>b</sup> C. Shen,<sup>\*c</sup> and G. S. Luo<sup>\*b</sup>

---

<sup>a</sup>The State Key Laboratory of Chemical Resource Engineering, Beijing Key Laboratory of Membrane Science and Technology, Beijing University of Chemical Technology, Beijing 100029, China

<sup>b</sup>The State Key Laboratory of Chemical Engineering, Department of Chemical Engineering, Tsinghua University, Beijing 100084, China. E-mail: [gsluo@tsinghua.edu.cn](mailto:gsluo@tsinghua.edu.cn).

<sup>c</sup>Beijing Key Laboratory of Bioprocess, College of Life Science and Technology, Beijing University of Chemical Technology, Beijing 100029, China. E-mail: [shenchun@mail.buct.edu.cn](mailto:shenchun@mail.buct.edu.cn).

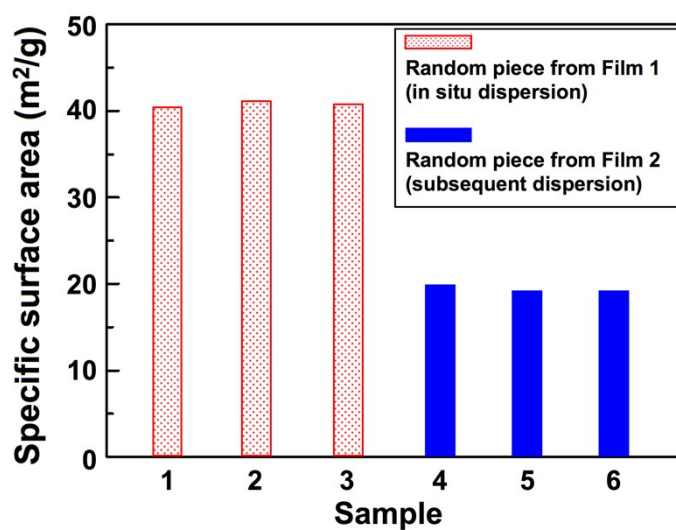

**Fig. S1** Specific surface areas (using the five-point BET method) of the samples from the two particle-coated films (each sample was a 3 mm × 3 mm piece, which was randomly cut from the particle-coated film: Film 1 represents the film with in situ dispersed 4.7g/L particles and Film 2 represents the film with subsequent dispersed 4.7g/L particles).

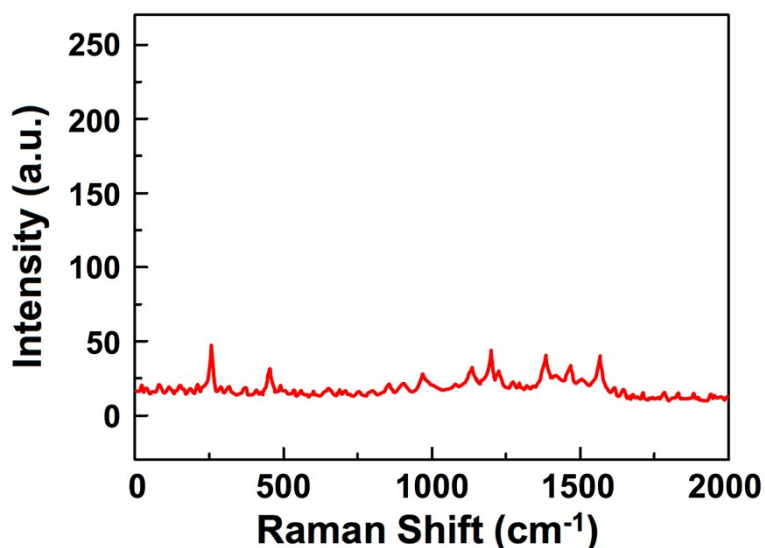

**Fig. S2** Raman spectra of  $1.0 \times 10^{-8}$  mol/L R6G solution on the PDMS film coated with the in situ dispersed 4.7 g/L nano-Ag suspension.

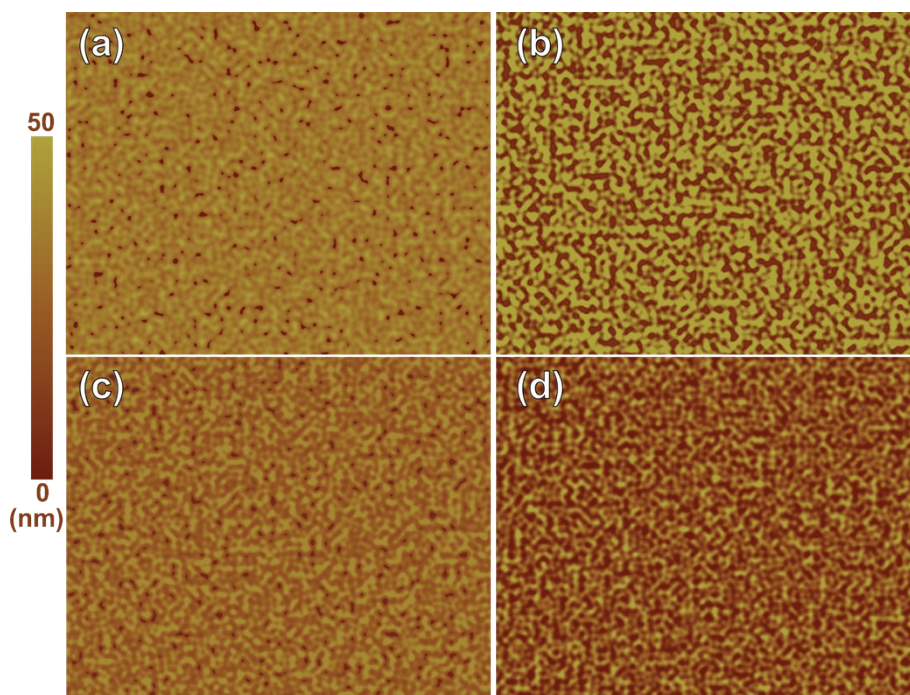

**Fig. S3** AFM images of the PDMS films in the stability experiments: (a) the initial PDMS film coated with the nano-Ag suspension of 4.7 g/L obtained by in situ dispersion; (b) the initial PDMS film coated with the nano-Ag suspension of 4.7 g/L obtained by subsequent dispersion; (c) after 15 cycles of solvent washing, the PDMS film coated with the nano-Ag suspension of 4.7 g/L obtained by in situ dispersion; (d) after 15 cycles of solvent washing, the PDMS film coated with the nano-Ag suspension of 4.7 g/L obtained by subsequent dispersion.

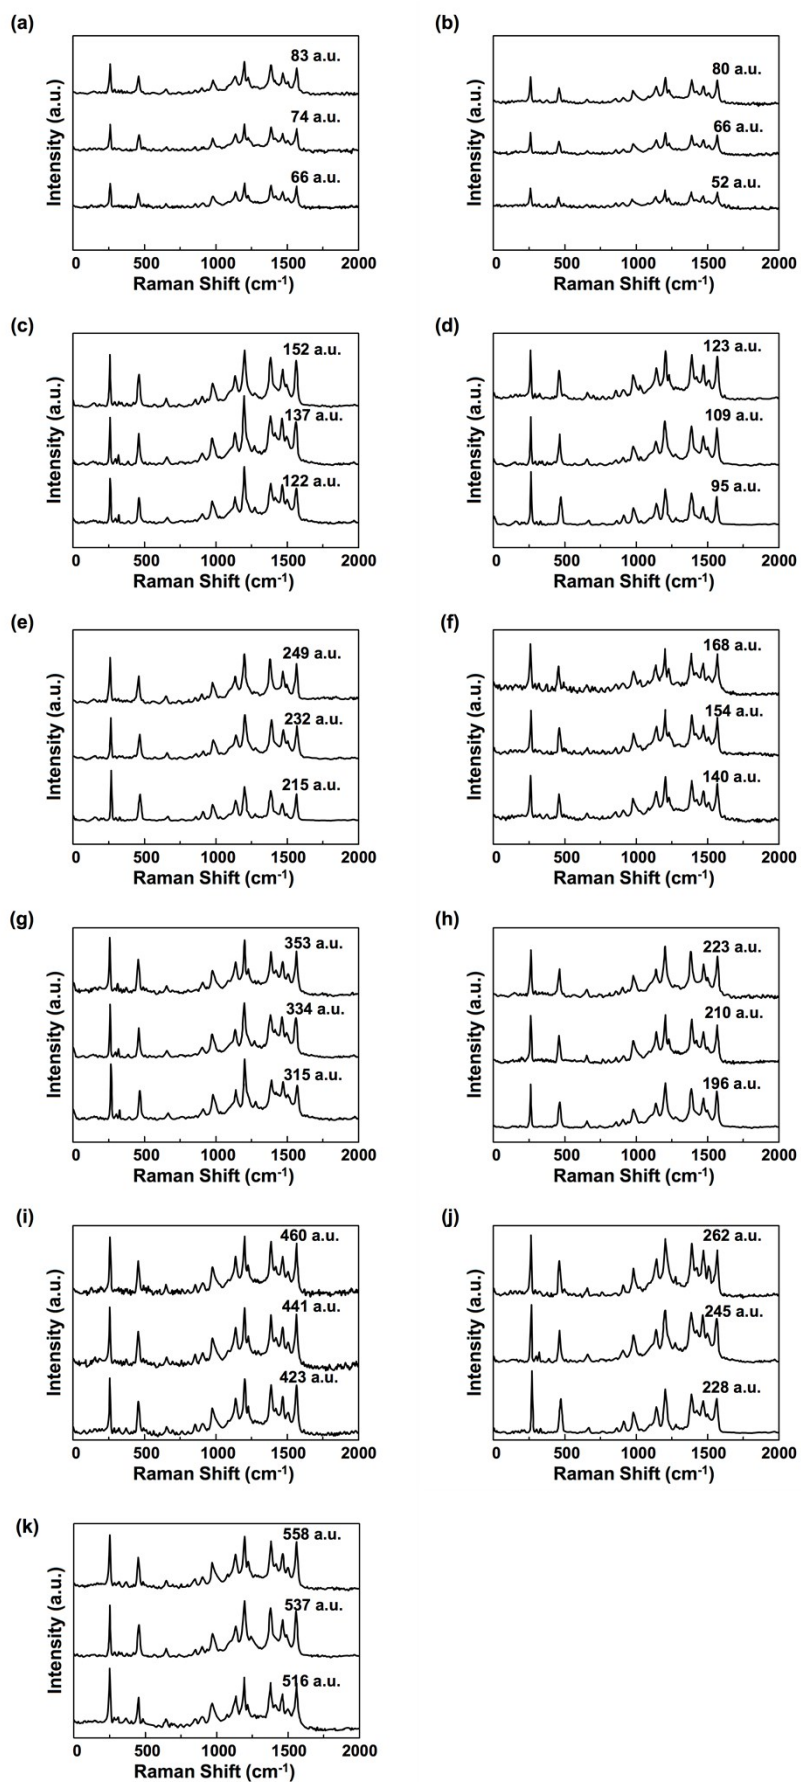

**Fig. S4** SERS responses on the PDMS film coated with nano-Ag suspension of 4.7

g/L obtained by in situ dispersion at varying R6G concentrations: (a)  $1.1 \times 10^{-8}$  mol/L, (c)  $2.2 \times 10^{-8}$  mol/L, (e)  $5.0 \times 10^{-8}$  mol/L, (g)  $1.05 \times 10^{-7}$  mol/L, (i)  $2.82 \times 10^{-7}$ , (k)  $6.08 \times 10^{-7}$  mol/L; SERS responses on the PDMS film coated with nano-Ag suspension of 4.7 g/L obtained by subsequent dispersion at varying R6G concentrations: (b)  $2.2 \times 10^{-8}$  mol/L, (d)  $5.0 \times 10^{-8}$  mol/L, (f)  $1.05 \times 10^{-7}$  mol/L, (h)  $2.82 \times 10^{-7}$  mol/L, (j)  $6.08 \times 10^{-7}$  mol/L.
